# Supplementary figures and images for: The efficacy and safety of IL-13 inhibitors in atopic dermatitis: A systematic review and updated meta-analysis
Source: Research Square preprint supplement (doi:10.21203/rs.3.rs-7397994/v1), 2025-09-26

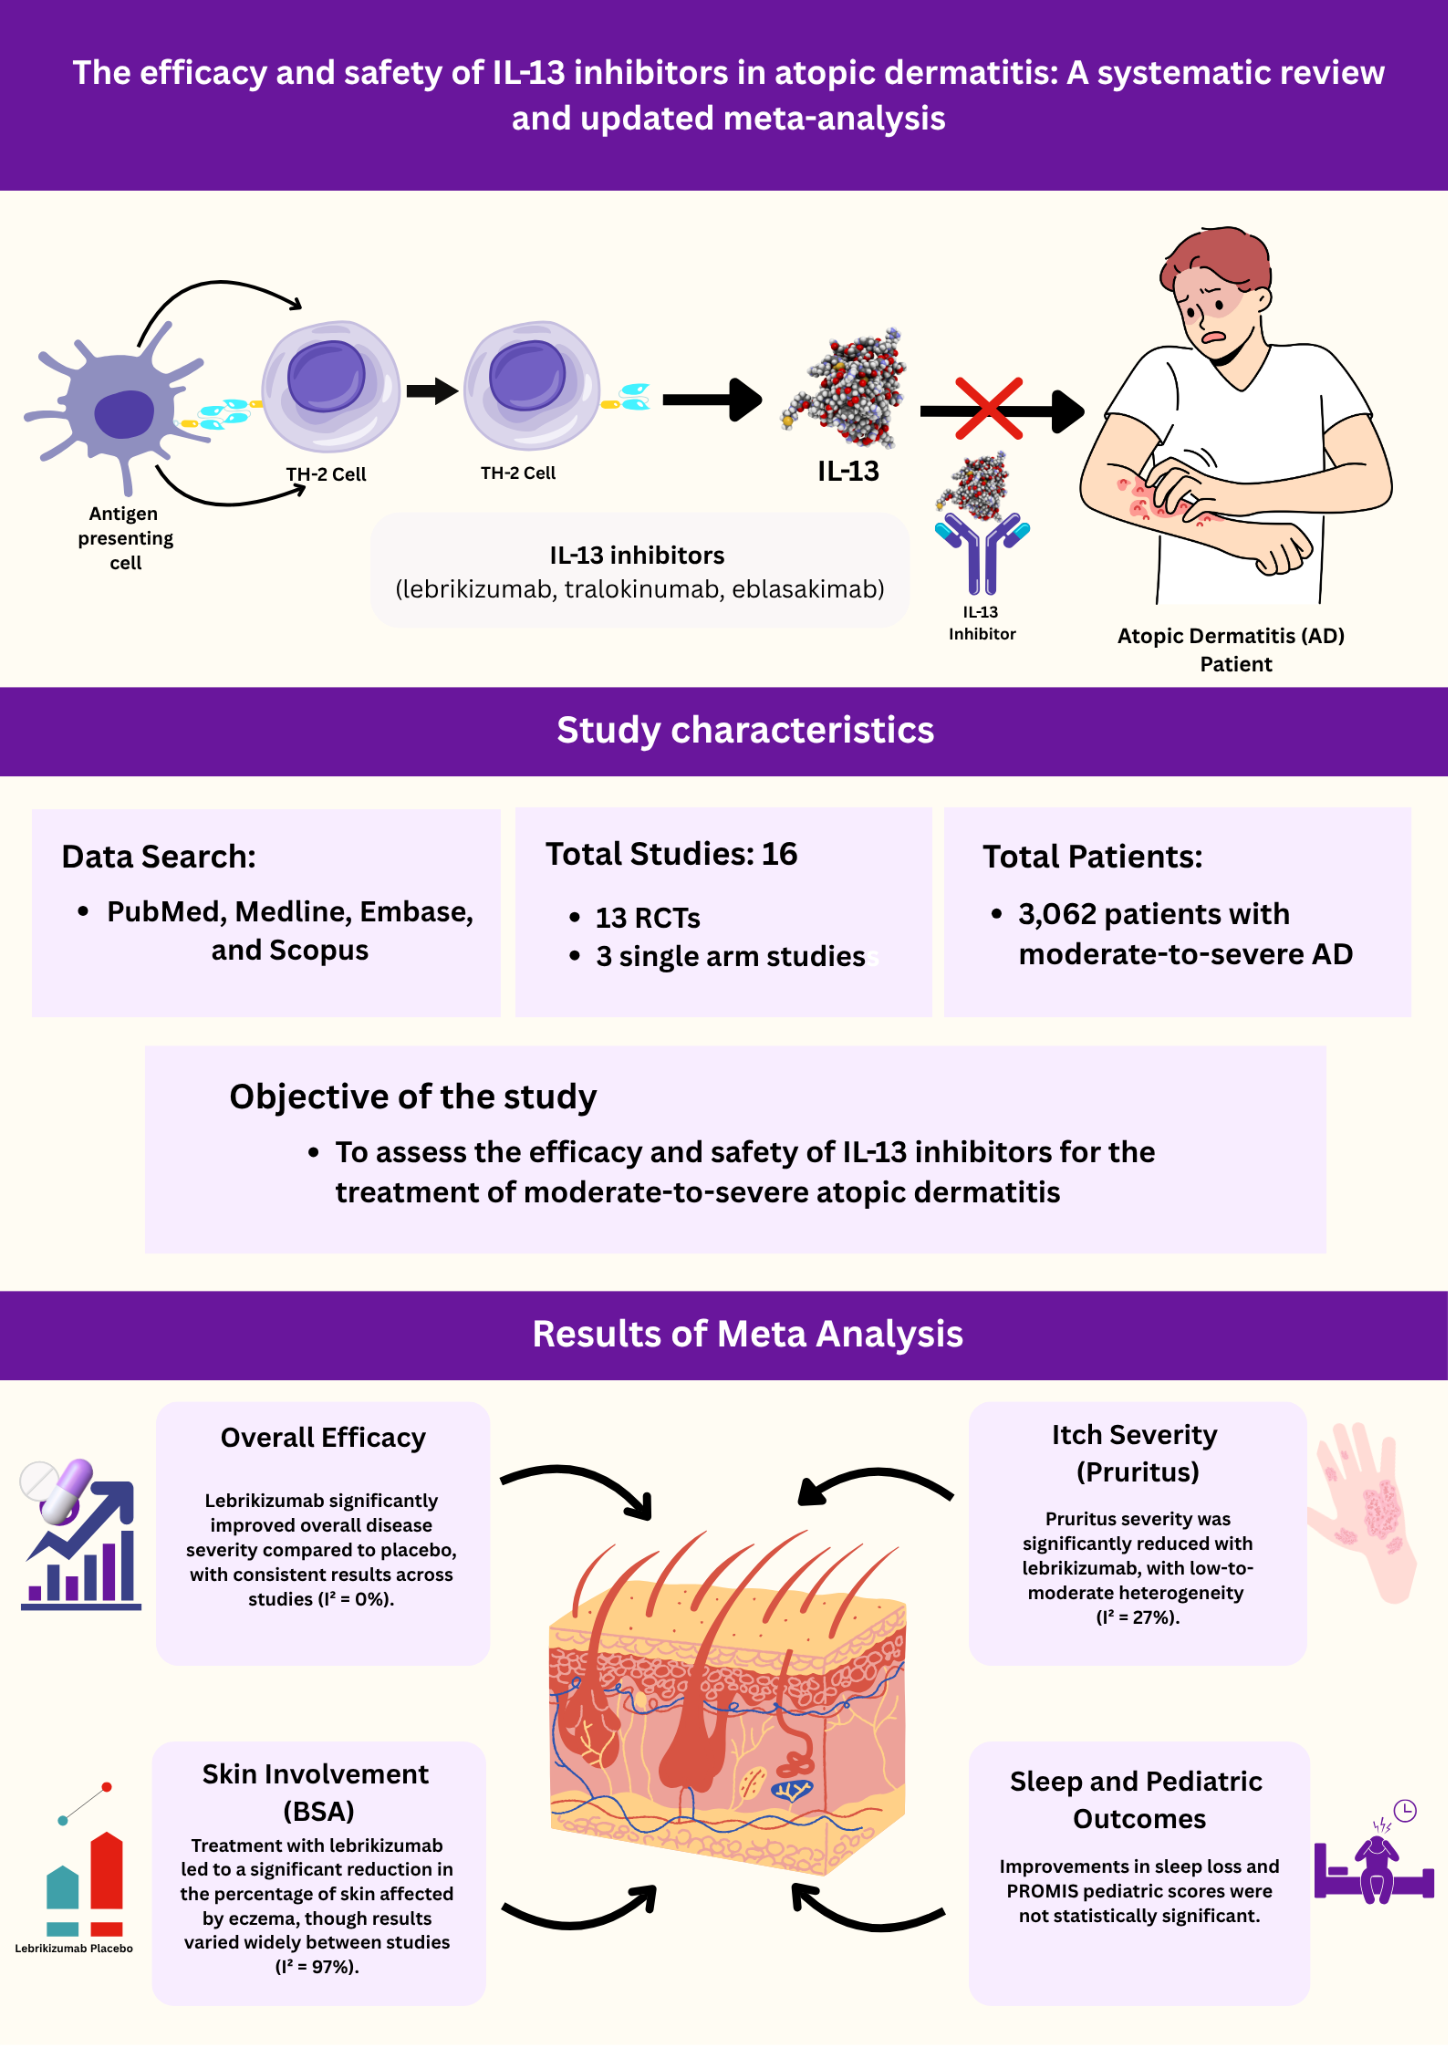

Supplement: Supplementary file 1 [file e26d427d79798b34aaef6849.docx]
